# Supplementary material
Source: Springer Nature journal article supplement (https://www.springermedizin.de/resource/supplementary/12906_2010_359_MOESM7_ESM.pdf/9519532)
Supplement: MOESM7 [file 9519532]

Resveratrol

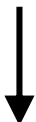

Low production of  
hydrogen peroxide

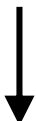

Hormetic redox signal

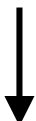

Activation of Nrf2

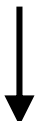

Induction of HO-1 gene  
expression

Ascorbic acid

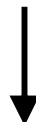

High production of  
hydrogen peroxide

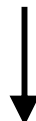

Stress signal

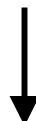

Inactivation of Nrf2

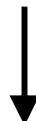

No induction of HO-1  
gene expression
